# Supplementary material
Source: MDPI journal article supplement (https://www.mdpi.com/1424-2818/13/12/684)
Supplement: s1 [file s1]

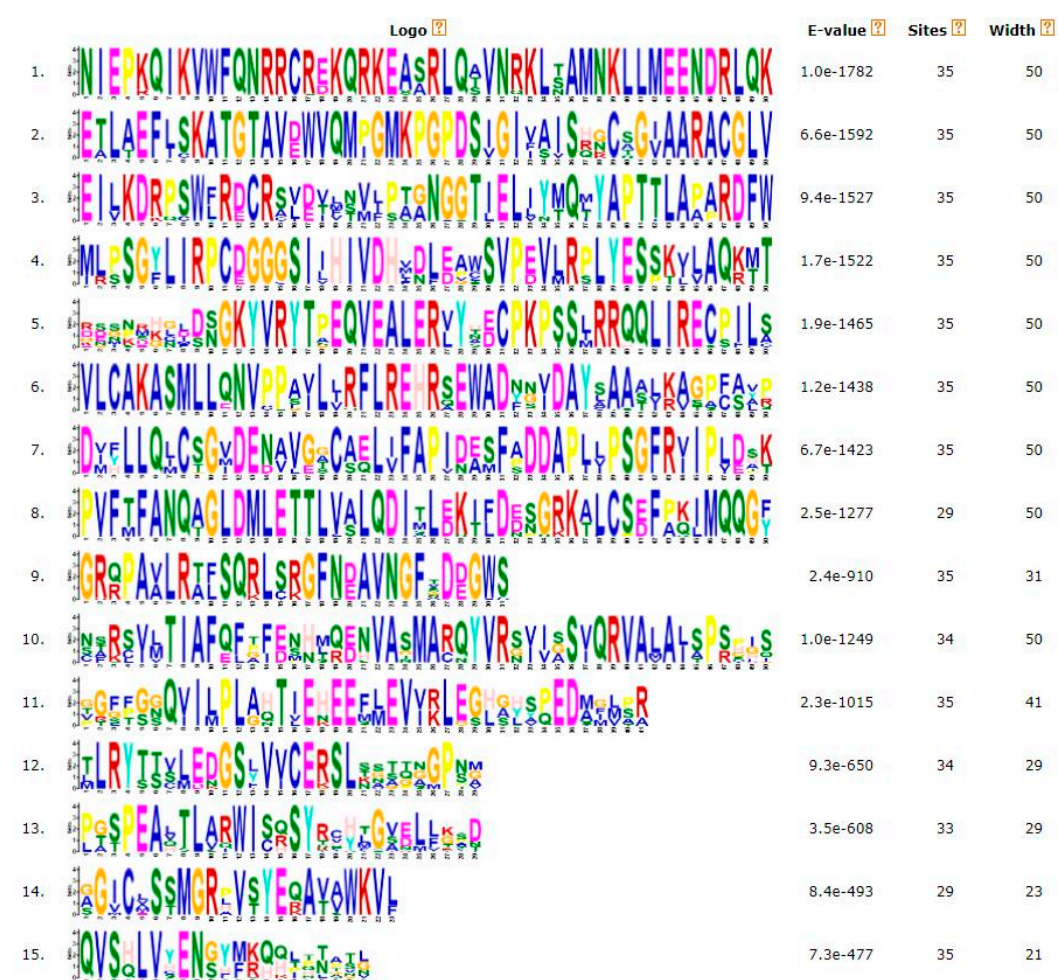

**Figure S1.** Logo of the conserved motifs of the HD-ZIP III proteins.

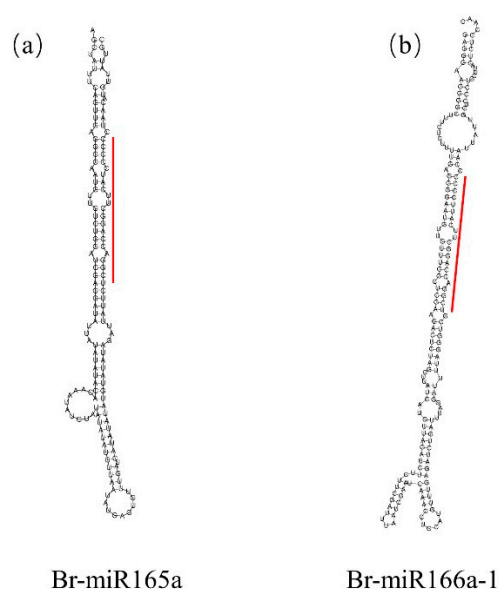

**Figure S2.** Prediction of miR165/166 stem-loop structures that produced miR165/166 in *B. rapa* using an RNAfold web server.

Predicted secondary stem-loop structures of miR165a (a) and miR166a-1(b) using the miRNA precursor sequences from *B. rapa*. Red lines indicate the mature miRNA sequences.
